# NEW TITLES from AMERICAN PSYCHIATRIC ASSOCIATION PUBLISHING

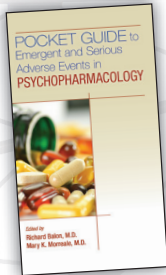

## **Pocket Guide to Emergent and Serious Adverse Events in Psychopharmacology**

Edited by Richard Balon, M.D., and Mary K. Morreale, M.D.

This book summarizes current knowledge of adverse events from acute dystonia and cardiac emergencies to hepatotoxicity and ocular side effects. Readers will come away with a better understanding of the recognition and detection of adverse events in psychopharmacology, culprit medications, assessment, management, and follow-up treatment.

2023 • 236 pages • ISBN 978-1-61537-453-3 • Paperback • \$61.00 • Item #37453  
2023 • 236 pages • ISBN 978-1-61537-454-0 • eBook • \$48.95 • Item #37454

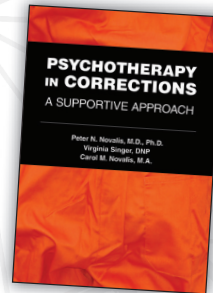

## **Psychotherapy in Corrections A Supportive Approach**

Peter N. Novalis, M.D., Ph.D., Virginia Singer, DNP, and Carol M. Novalis, M.A.

To practice psychotherapy in a correctional setting is to encounter a range of cultural issues reflecting the various ethnic, class, gender, and physical subgroups of the prison population—as well as to navigate the culture of the prison, staff, and justice system that underpins the patients' circumstances. This book offers mental health professionals a comprehensive look at the most common situations they are likely to face and provides practical advice on dealing with them.

2023 • 536 pages • ISBN 978-1-61537-332-1 • Paperback • \$89.00 • Item #37332  
2023 • 536 pages • ISBN 978-1-61537-432-8 • eBook • \$71.00 • Item #37432

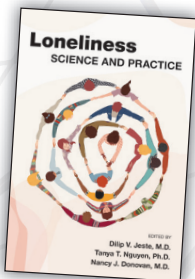

## **Loneliness Science and Practice**

Edited by Dilip V. Jeste, M.D., Tanya T. Nguyen, Ph.D., and Nancy J. Donovan, M.D.

Offering a comprehensive review of the current literature, this book aims to construct a translational framework for recognizing and addressing loneliness in the clinical context. With clinical vignettes that help ground the information in real-world applicability, this guide presents the theoretical foundations of loneliness; discusses the epidemiology of loneliness throughout the life cycle; examines loneliness in specific populations; analyzes the psychosocial and biological mechanisms of loneliness; and describes research- and community-based interventions.

2023 • 264 pages • ISBN 978-1-61537-422-9 • Paperback • \$53.00 • Item #37422  
2023 • 264 pages • ISBN 978-1-61537-423-6 • eBook • \$42.50 • Item #37423

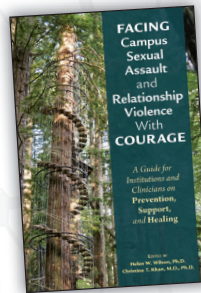

## **Facing Campus Sexual Assault and Relationship Violence With Courage A Guide for Institutions and Clinicians on Prevention, Support, and Healing**

Edited by Helen W. Wilson, Ph.D., and Christina T. Khan M.D., Ph.D.

This new volume leverages the wisdom of psychiatry, college mental health, and higher education to develop a holistic approach to addressing sexual and relationship violence on campuses. Chapters weave the latest science with real-world knowledge and practical applications that address prevention strategies from early childhood through the collegiate and graduate level; systems of

response and care; clinical interventions for both victims and perpetrators; and support for students from marginalized communities

2023 • 255 pages • ISBN 978-1-61537-443-4 • Paperback • \$54.00 • Item #37443  
2023 • 255 pages • ISBN 978-1-61537-444-1 • eBook • \$43.00 • Item #37444

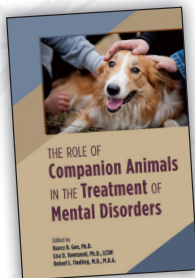

## **The Role of Companion Animals in the Treatment of Mental Disorders**

Edited by Nancy R. Gee, Ph.D., Lisa Townsend, LCSW-C, Ph.D., and Robert L. Findling, M.D., M.B.A.

Offering a scientifically grounded review of the latest research complemented by practical examples, this book examines the existing evidence to support these practices as well as the risks associated with various types of programs. This robust volume features detailed discussion of topics that include human-animal interactions in specific patient populations and settings, as well as best practices

for ensuring animal welfare and well-being with an emphasis on understanding applicable laws and regulations. Readers will come away with an understanding of the role that animals can play in mitigating psychiatric symptoms, engaging patients in treatment, and enhancing well-being—as well as key principles and considerations for determining whether an animal-based intervention is appropriate for a given patient.

2023 • 314 pages • ISBN 978-1-61537-455-7 • Paperback • \$55.00 • Item #37455  
2023 • 314 pages • ISBN 978-1-61537-456-4 • eBook • \$44.00 • Item #37456

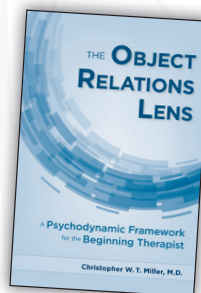

## **The Object Relations Lens A Psychodynamic Framework for the Beginning Therapist**

Christopher W.T. Miller, M.D.

With a mix of theory, practical advice, and illustrative clinical material, this is a compelling and indispensable resource for any clinician interested in applying the object relations model to their clinical or academic work. As accessible to trainees as it is to experienced clinicians, Dr. Christopher Miller clearly outlines object relations theory, leveraging clinical vignettes to underline the framework's applicability both in therapy and acute care settings.

2023 • 252 pages • ISBN 978-1-61537-428-1 • Paperback • \$52.00 • Item #37428  
2023 • 252 pages • ISBN 978-1-61537-429-8 • eBook • \$42.00 • Item #37429

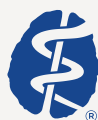



Searching for  
the perfect  
psychiatric  
career?

## Let APA JobCentral help!

### Manage Your Career

- Browse hundreds of active job listings!
- Create an account to save jobs, store multiple resumes and cover letters and communicate with employers through our internal messaging system.
- Set up multiple job alerts specifying your skills, interests and location to receive e-mails when employers post jobs that match your criteria.

### Recruit for Open Positions

- Post your job in front of thousands of highly qualified psychiatrists.
- Cross promote your job listing in Psychiatric News.
- Search the anonymous resume database to find your ideal candidate.

AMERICAN  
**PSYCHIATRIC**  
ASSOCIATION

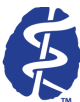

**JOBCENTRAL**  
The Career Hub for Psychiatry

[jobs.psychiatry.org](https://jobs.psychiatry.org)
